# Supplementary material
Source: Research Square preprint supplement (doi:10.21203/rs.3.rs-8873768/v1)
Supplement: Supplementary file 1 [file 6519bf3b50eda20545dfb055.docx]

**Appendices**

**Appendix 1: Local professional healthcare networks**

*15 Territorial Professional Health Communities Communities (Communautés Professionnelles Territoriales de Santé; CPTS)* : CPTS Canal Garonne, CPTS du Lauragais, CPTS du Val, CPTS la Providence, CPTS Nord Est Toulousain, CPTS Nord Toulousain, CPTS Toulouse Nougaro XIII-XV, CPTS Pastel, CPTS Portes du Lauragais, CPTS Sud Toulousain, CPTS Toulouse centre, CPTS Ouest Toulousain, CPTS Toulouse rive gauche, CPTS Volvestre Cœur de Garonne, CPTS du Comminges

**Appendix 2: Partner clinics**

*8 partner clinics providing access to current acute care and rehabilitation beds*: Centre gériatrique des Minimes, Clinique Monié, Cliniques du groupe Ramsay (L’union, Croix du Sud et les Cèdes) , Polyclinique de la Lèze, Clinique des Pyrénées, Centre de ressource territorial porté par l’EHPAD Maisonneuve.
